# Supplementary material
Source: bioRxiv or medRxiv preprint supplement (https://www.biorxiv.org/highwire/filestream/35469/field_highwire_adjunct_files/7/077701-3.pdf)

**A**

374 Pathways

Cancer Hallmarks

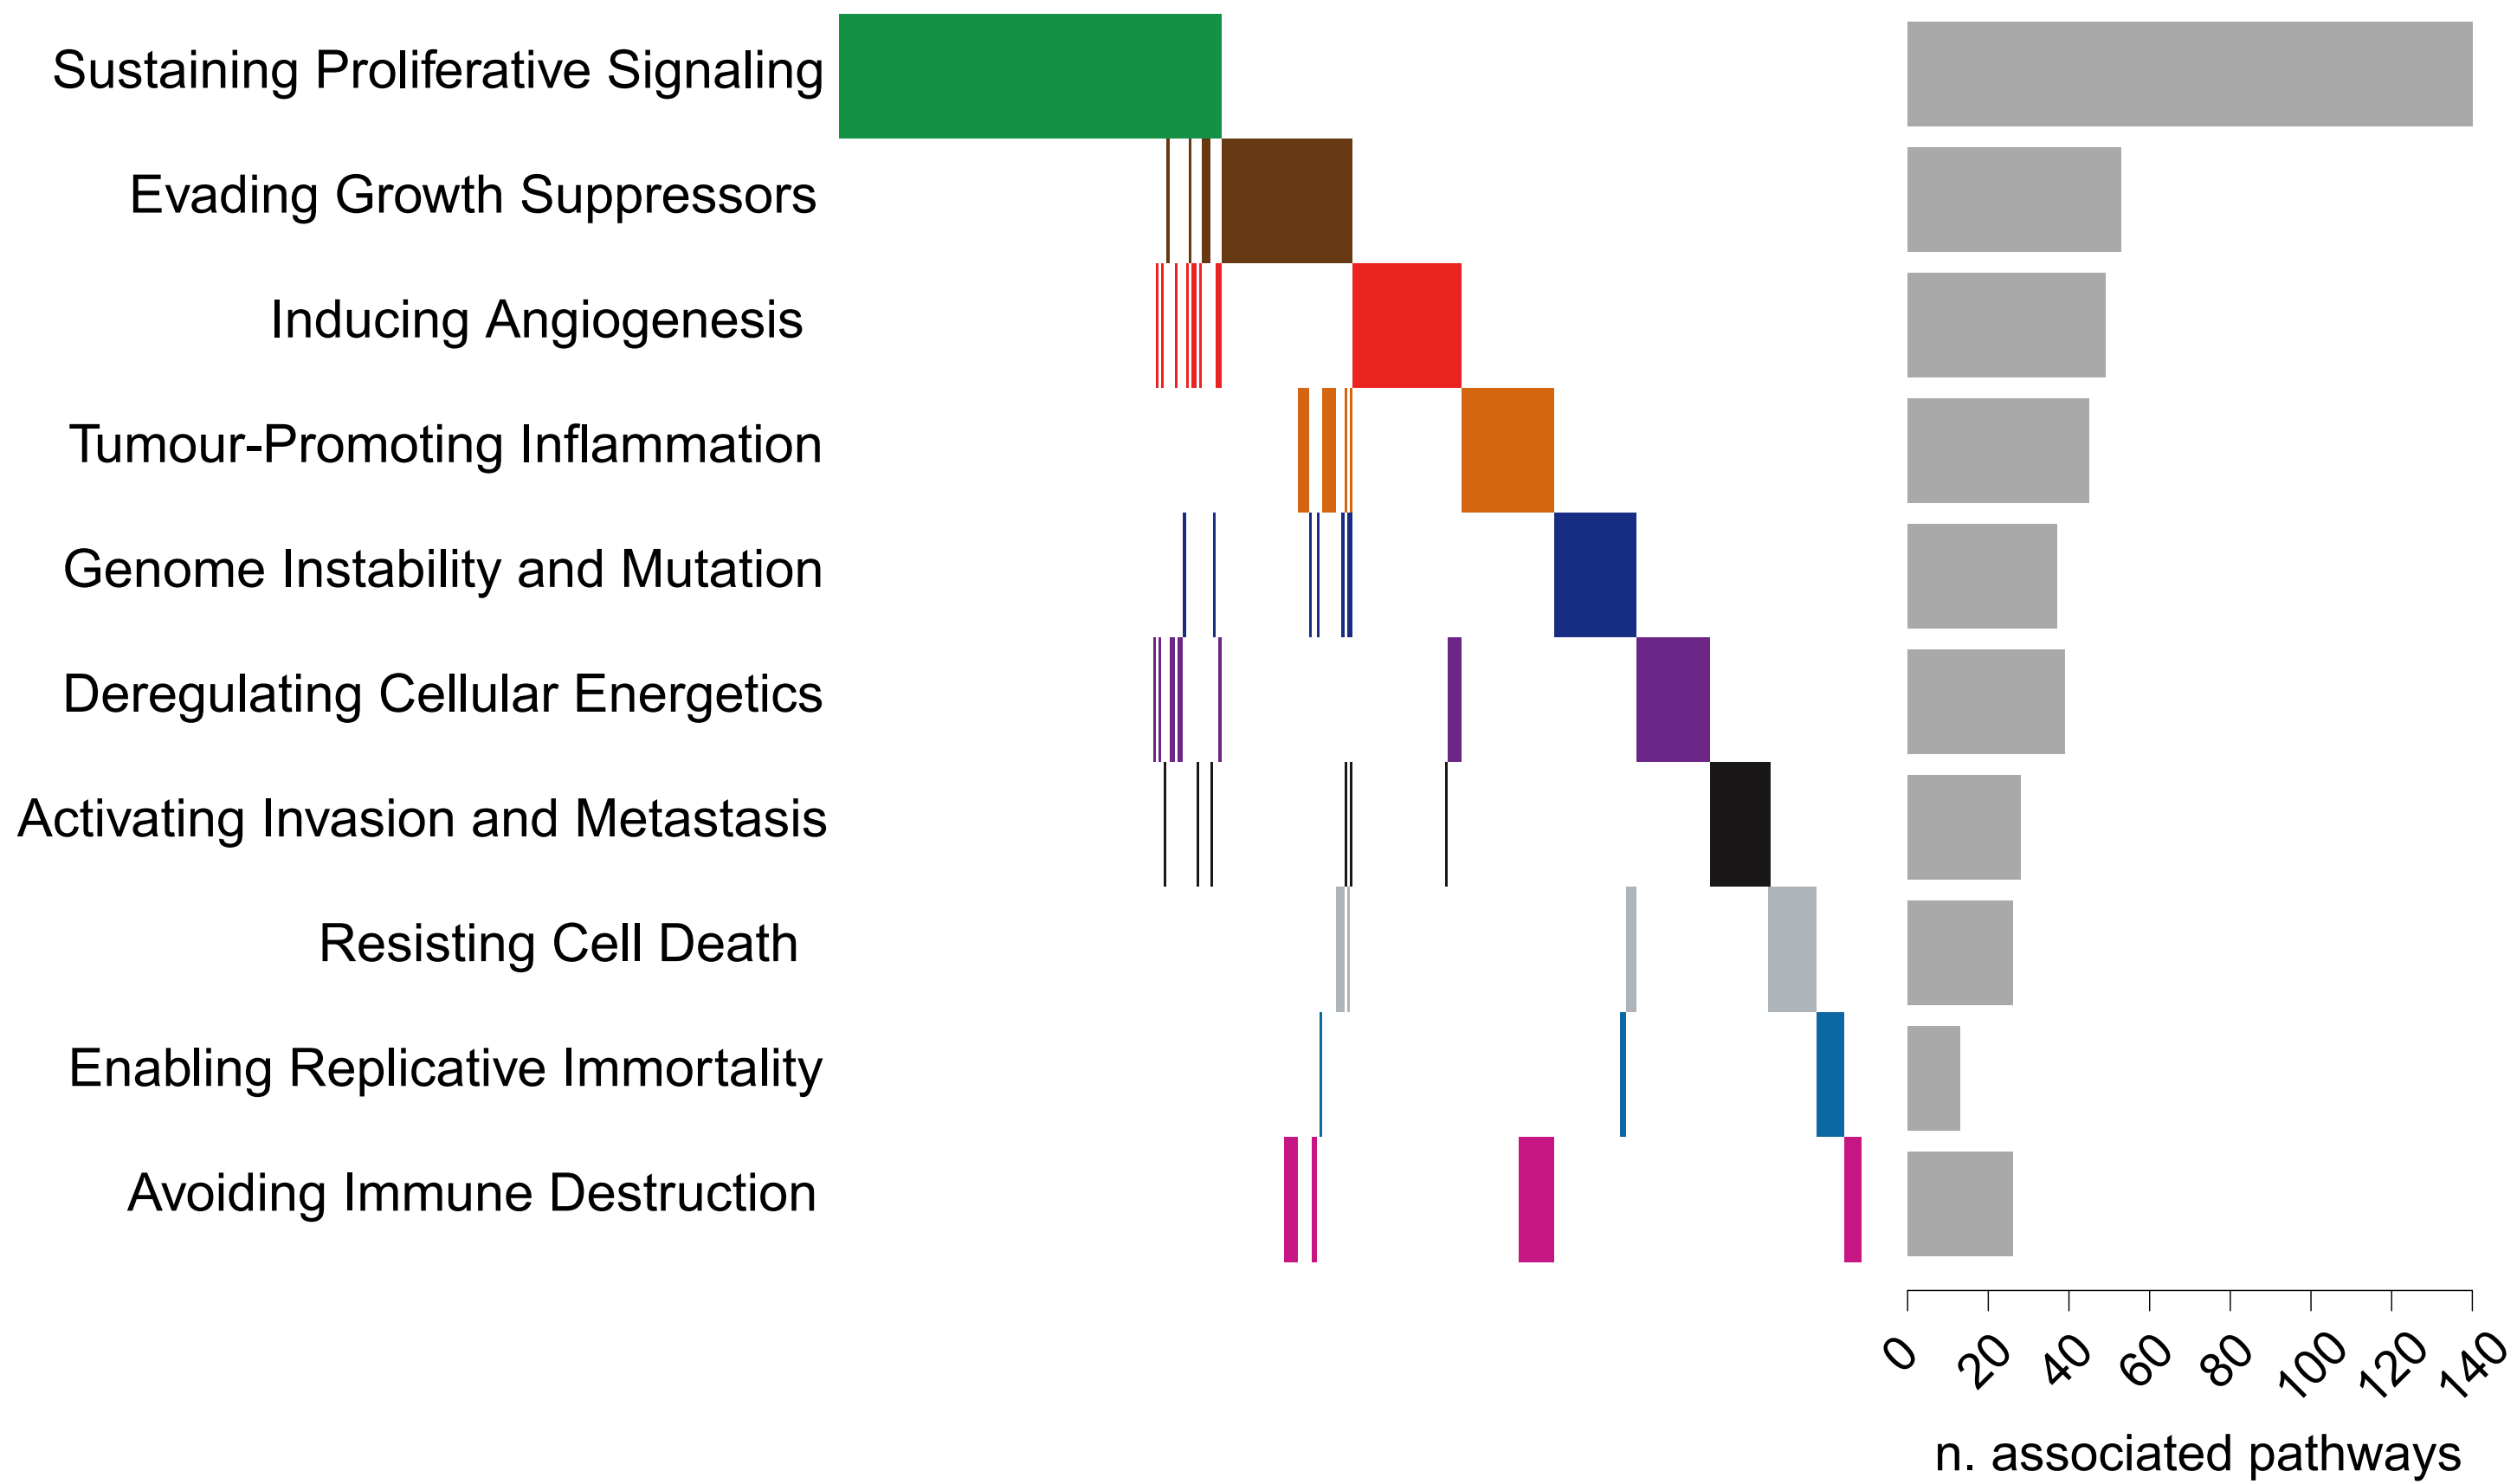**B**

3915 Genes

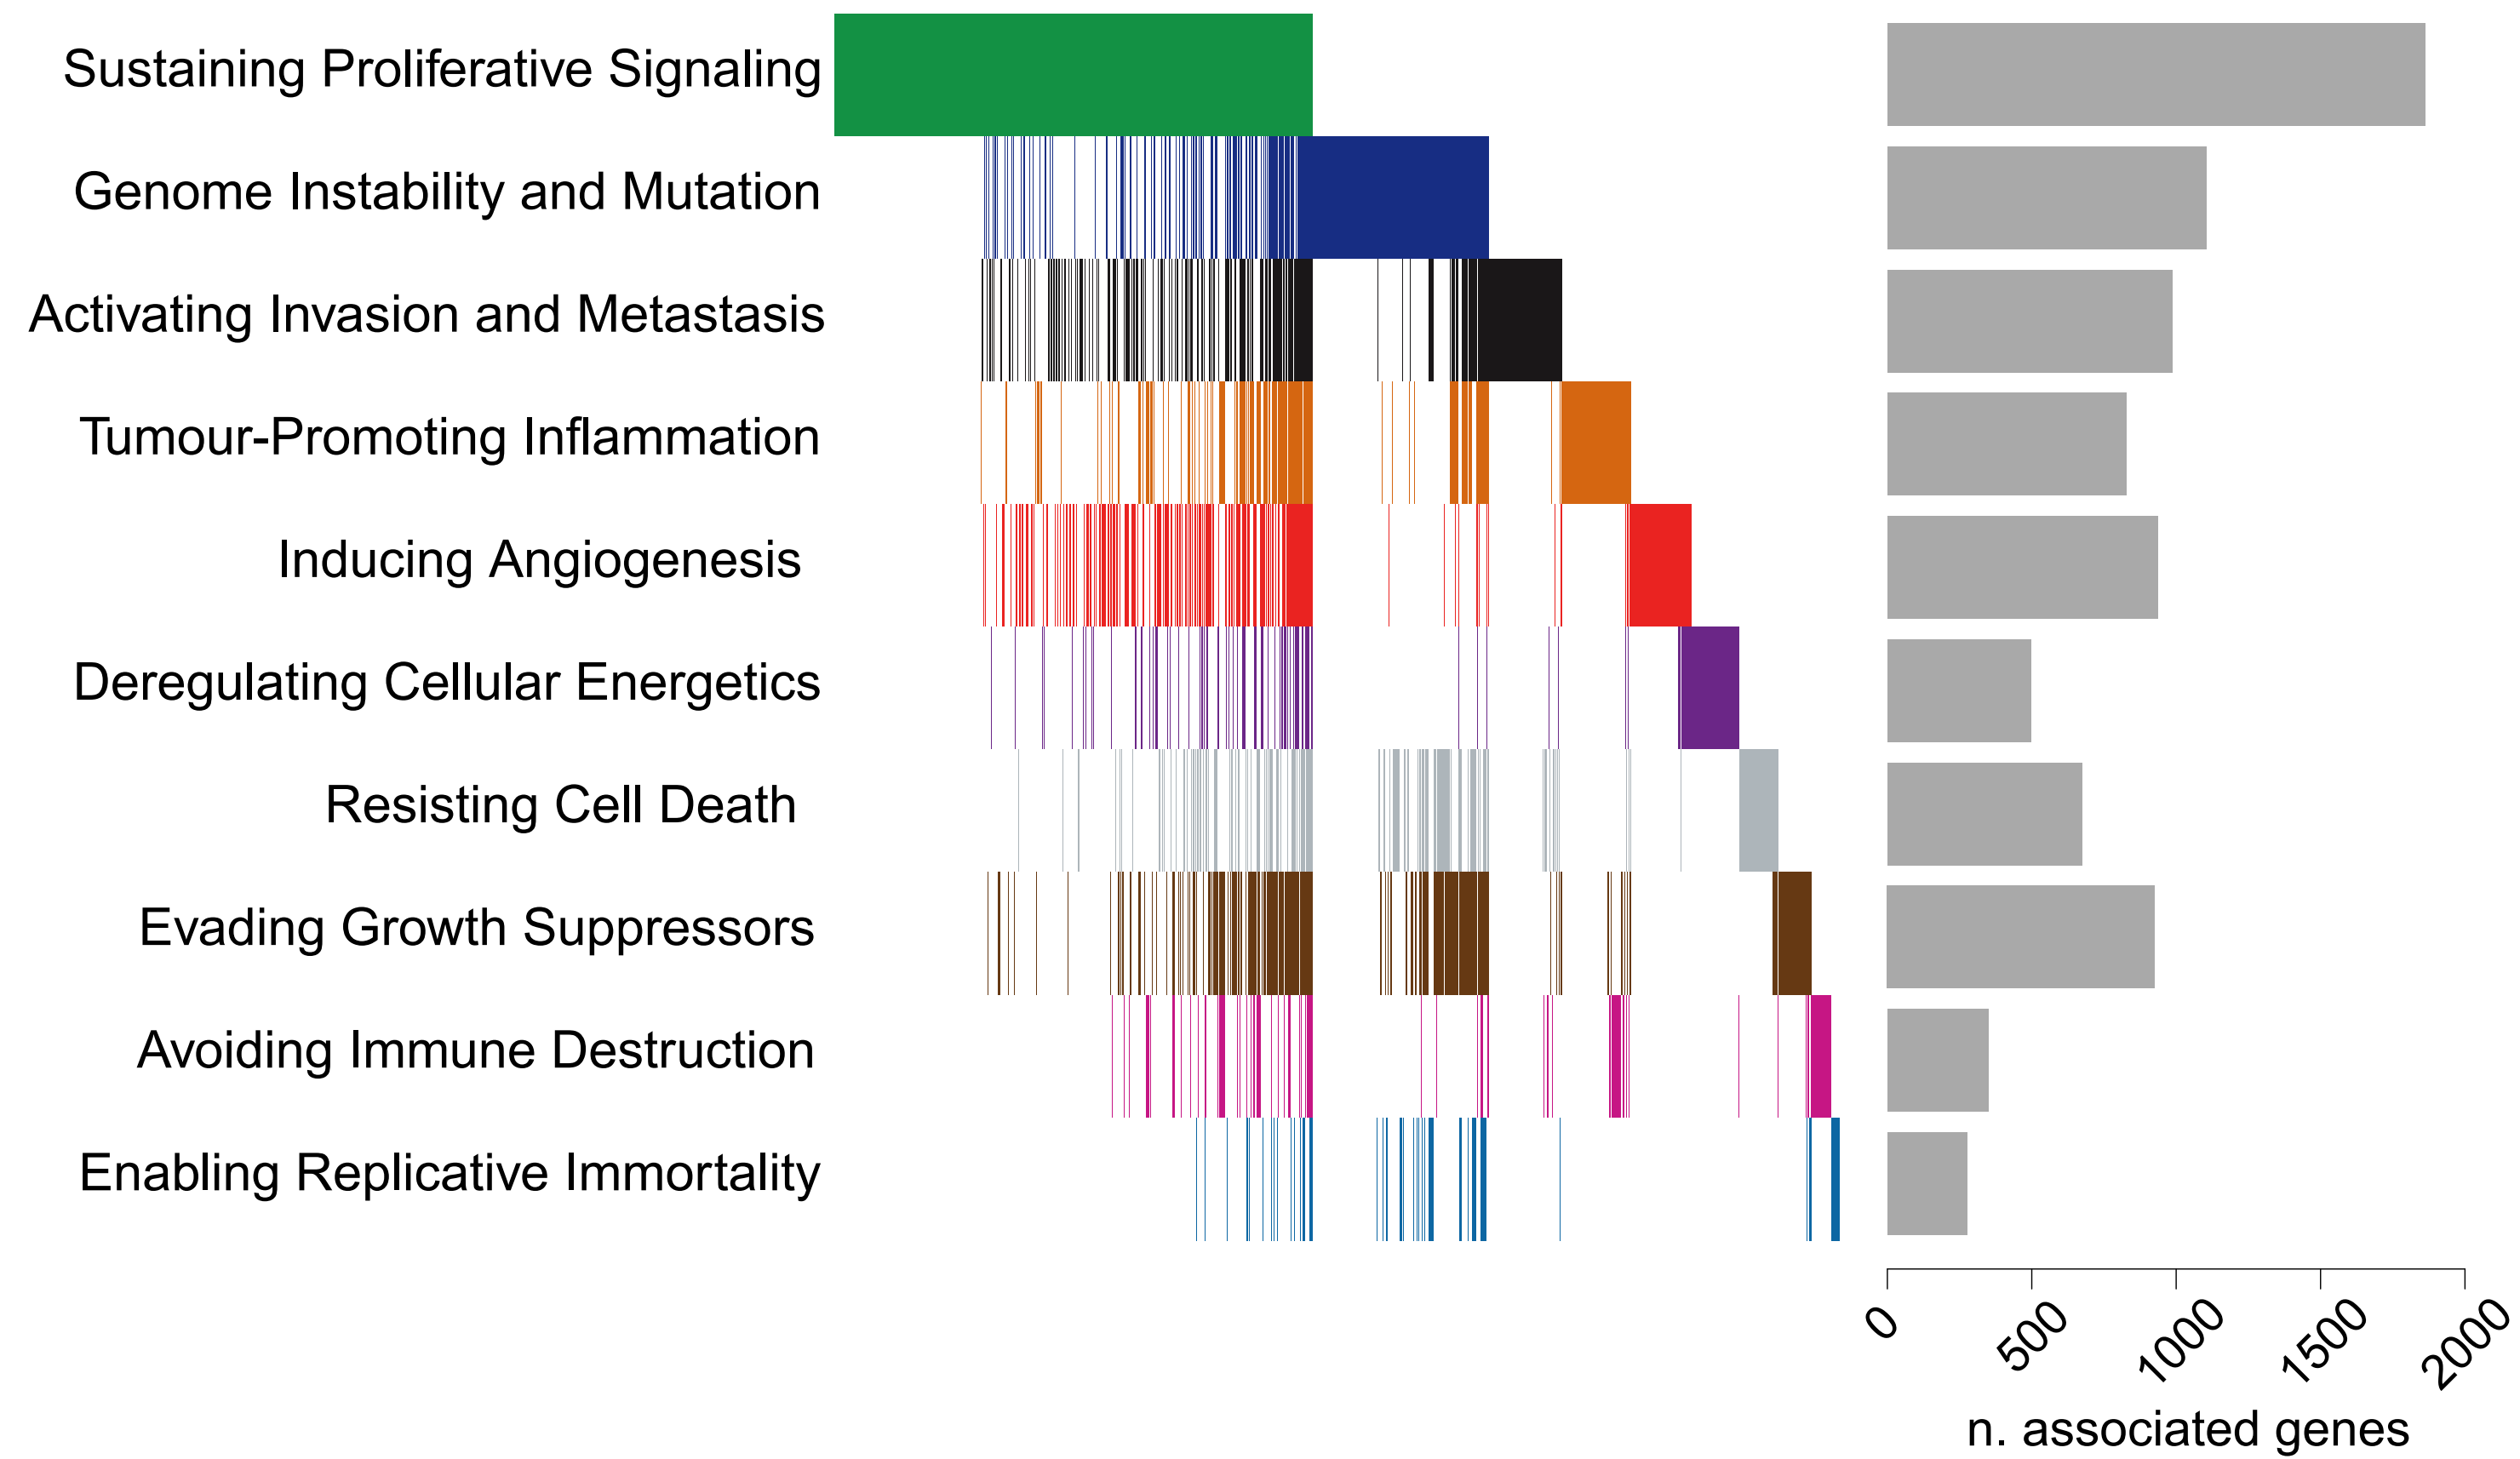**C**

n. Pathways

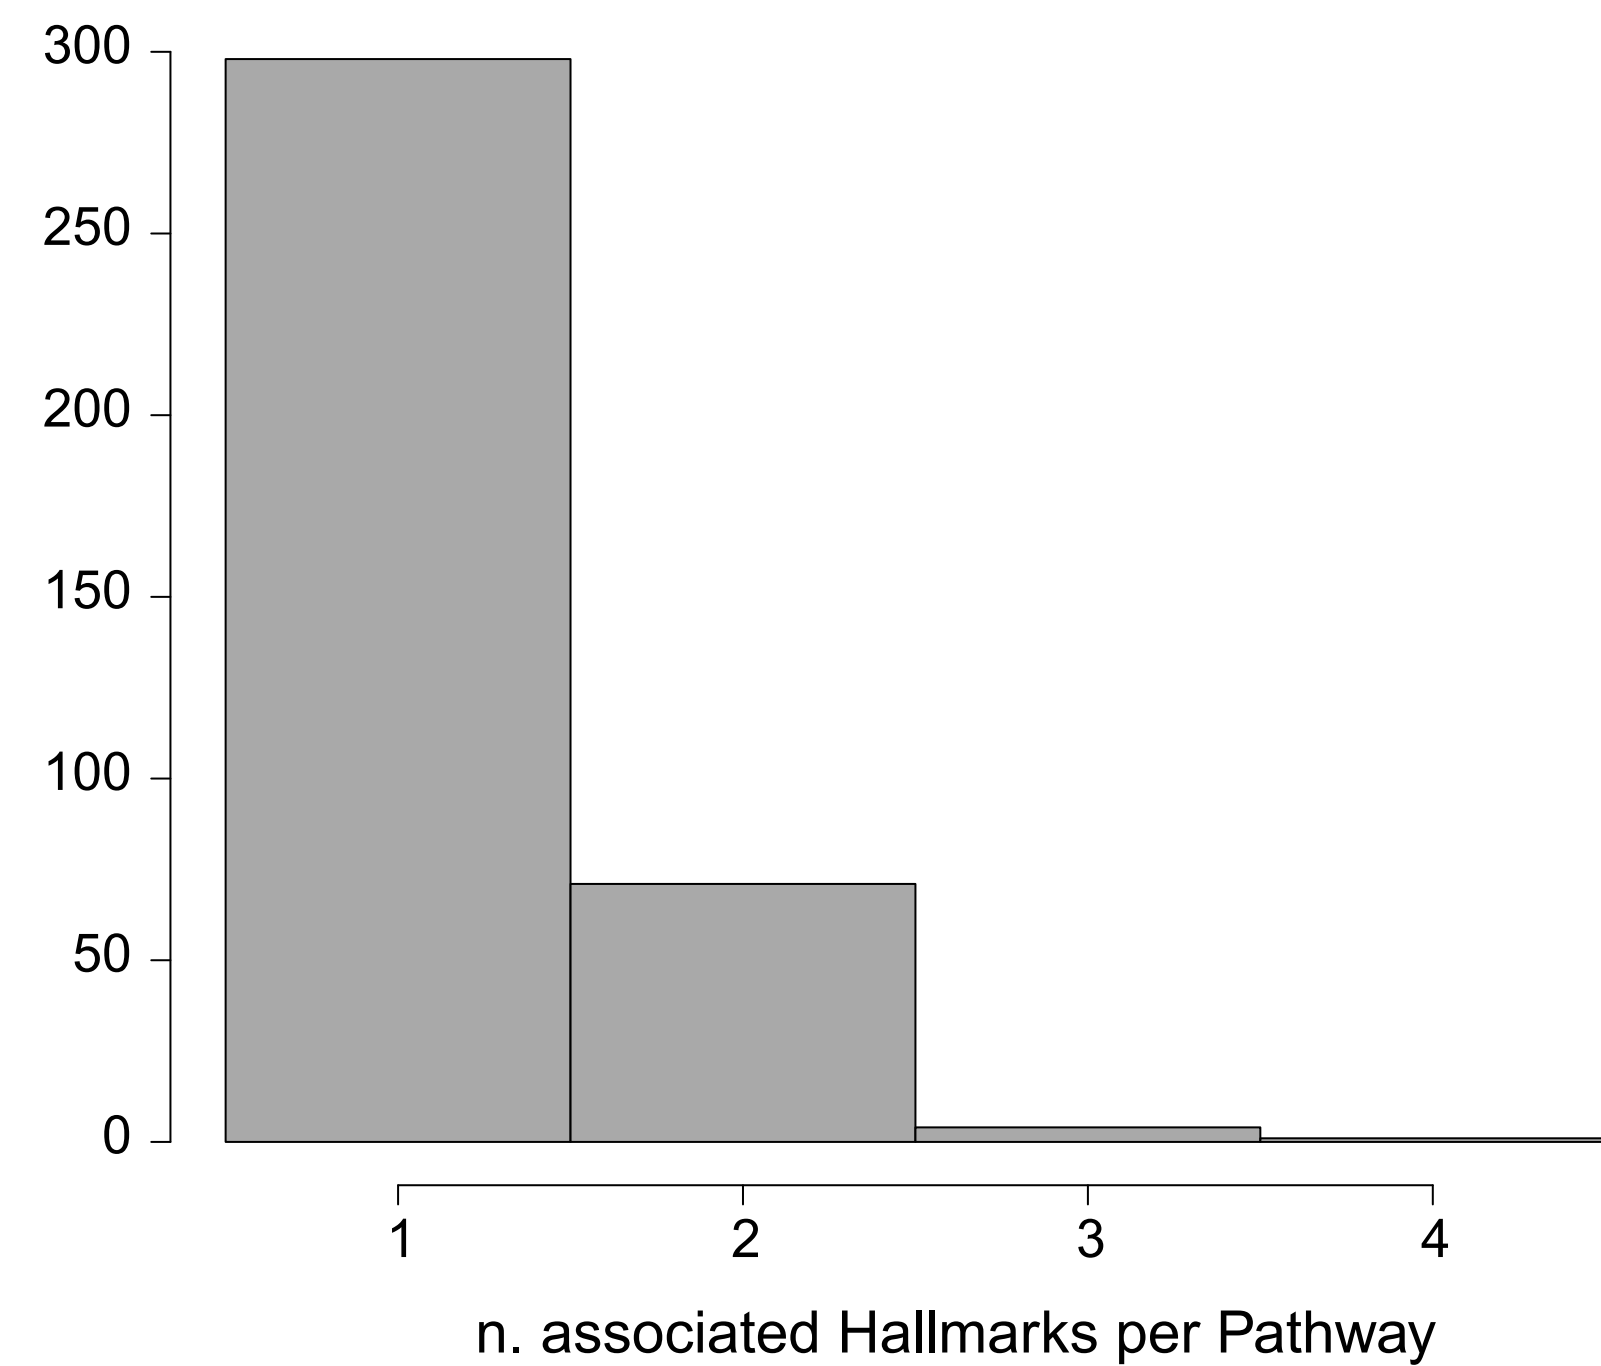**D**

n. Genes

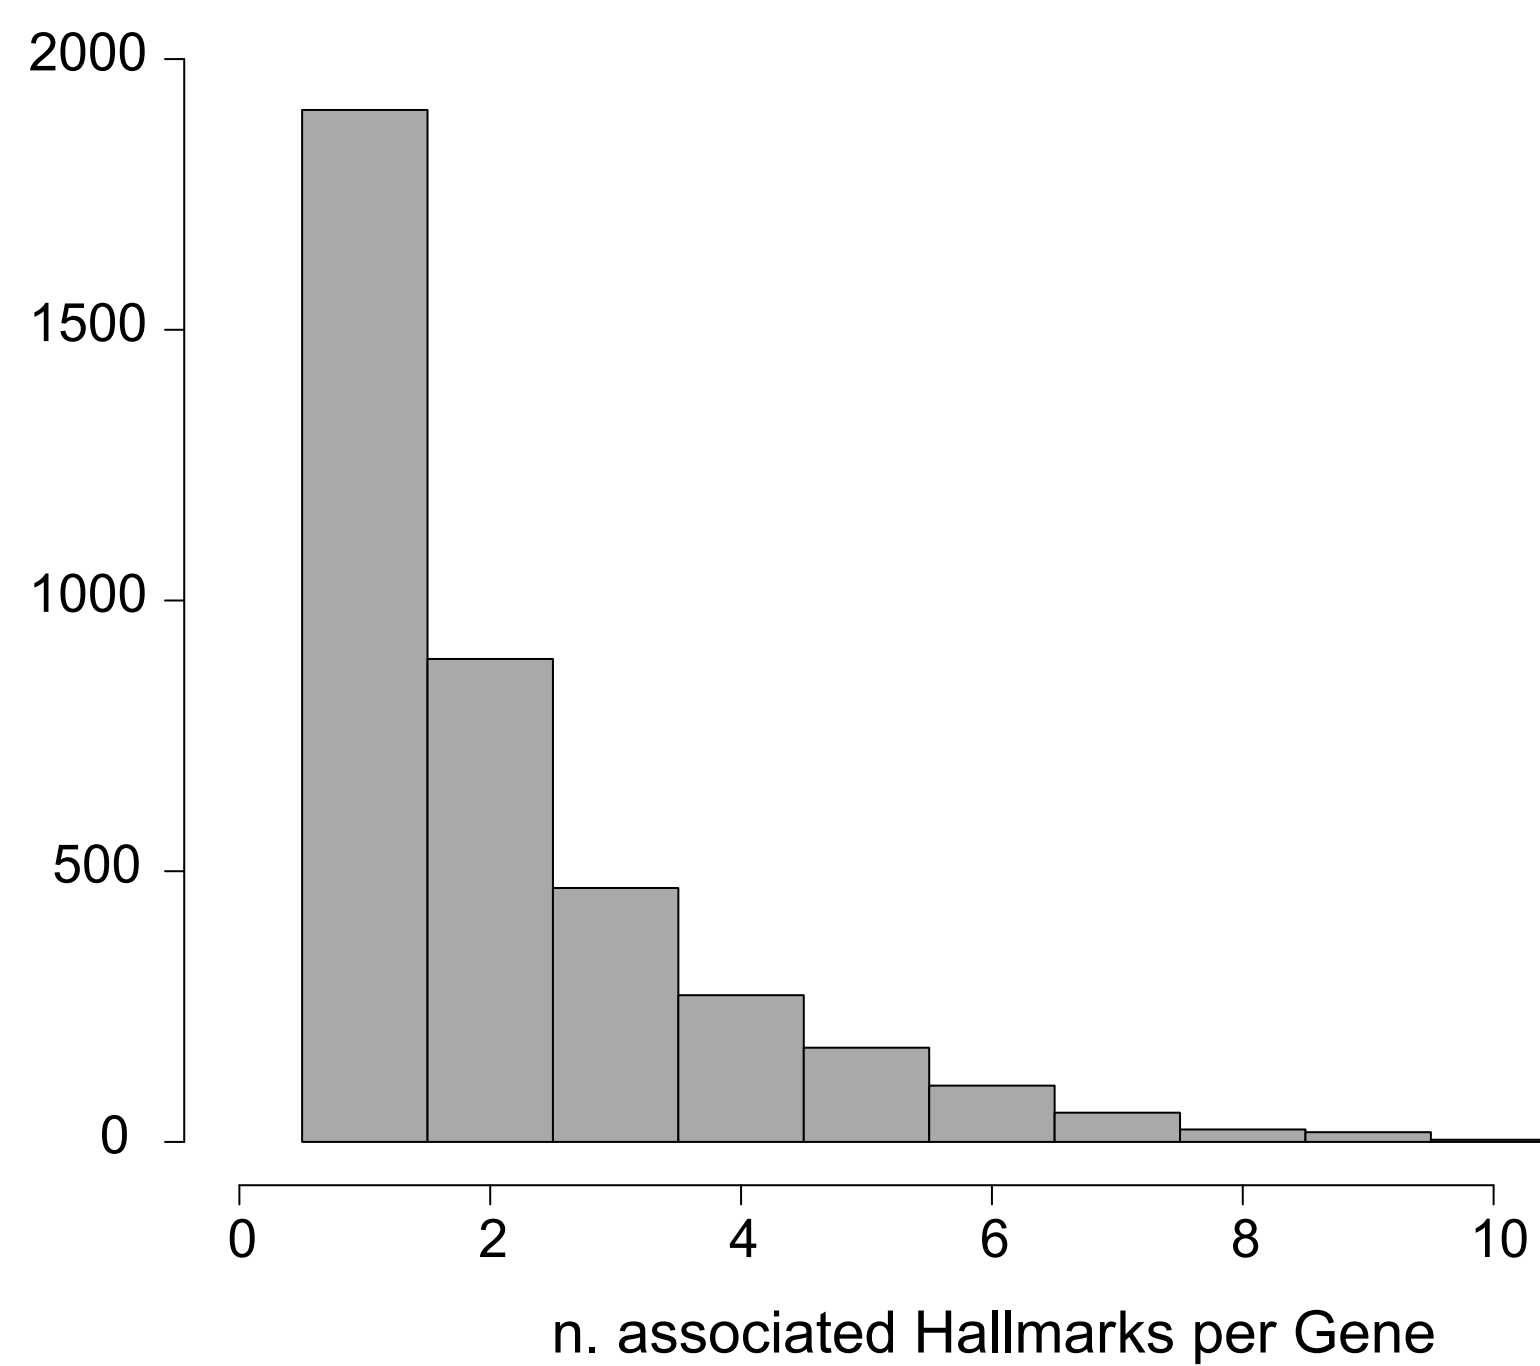**E**

n. Pathways pairwise overlaps

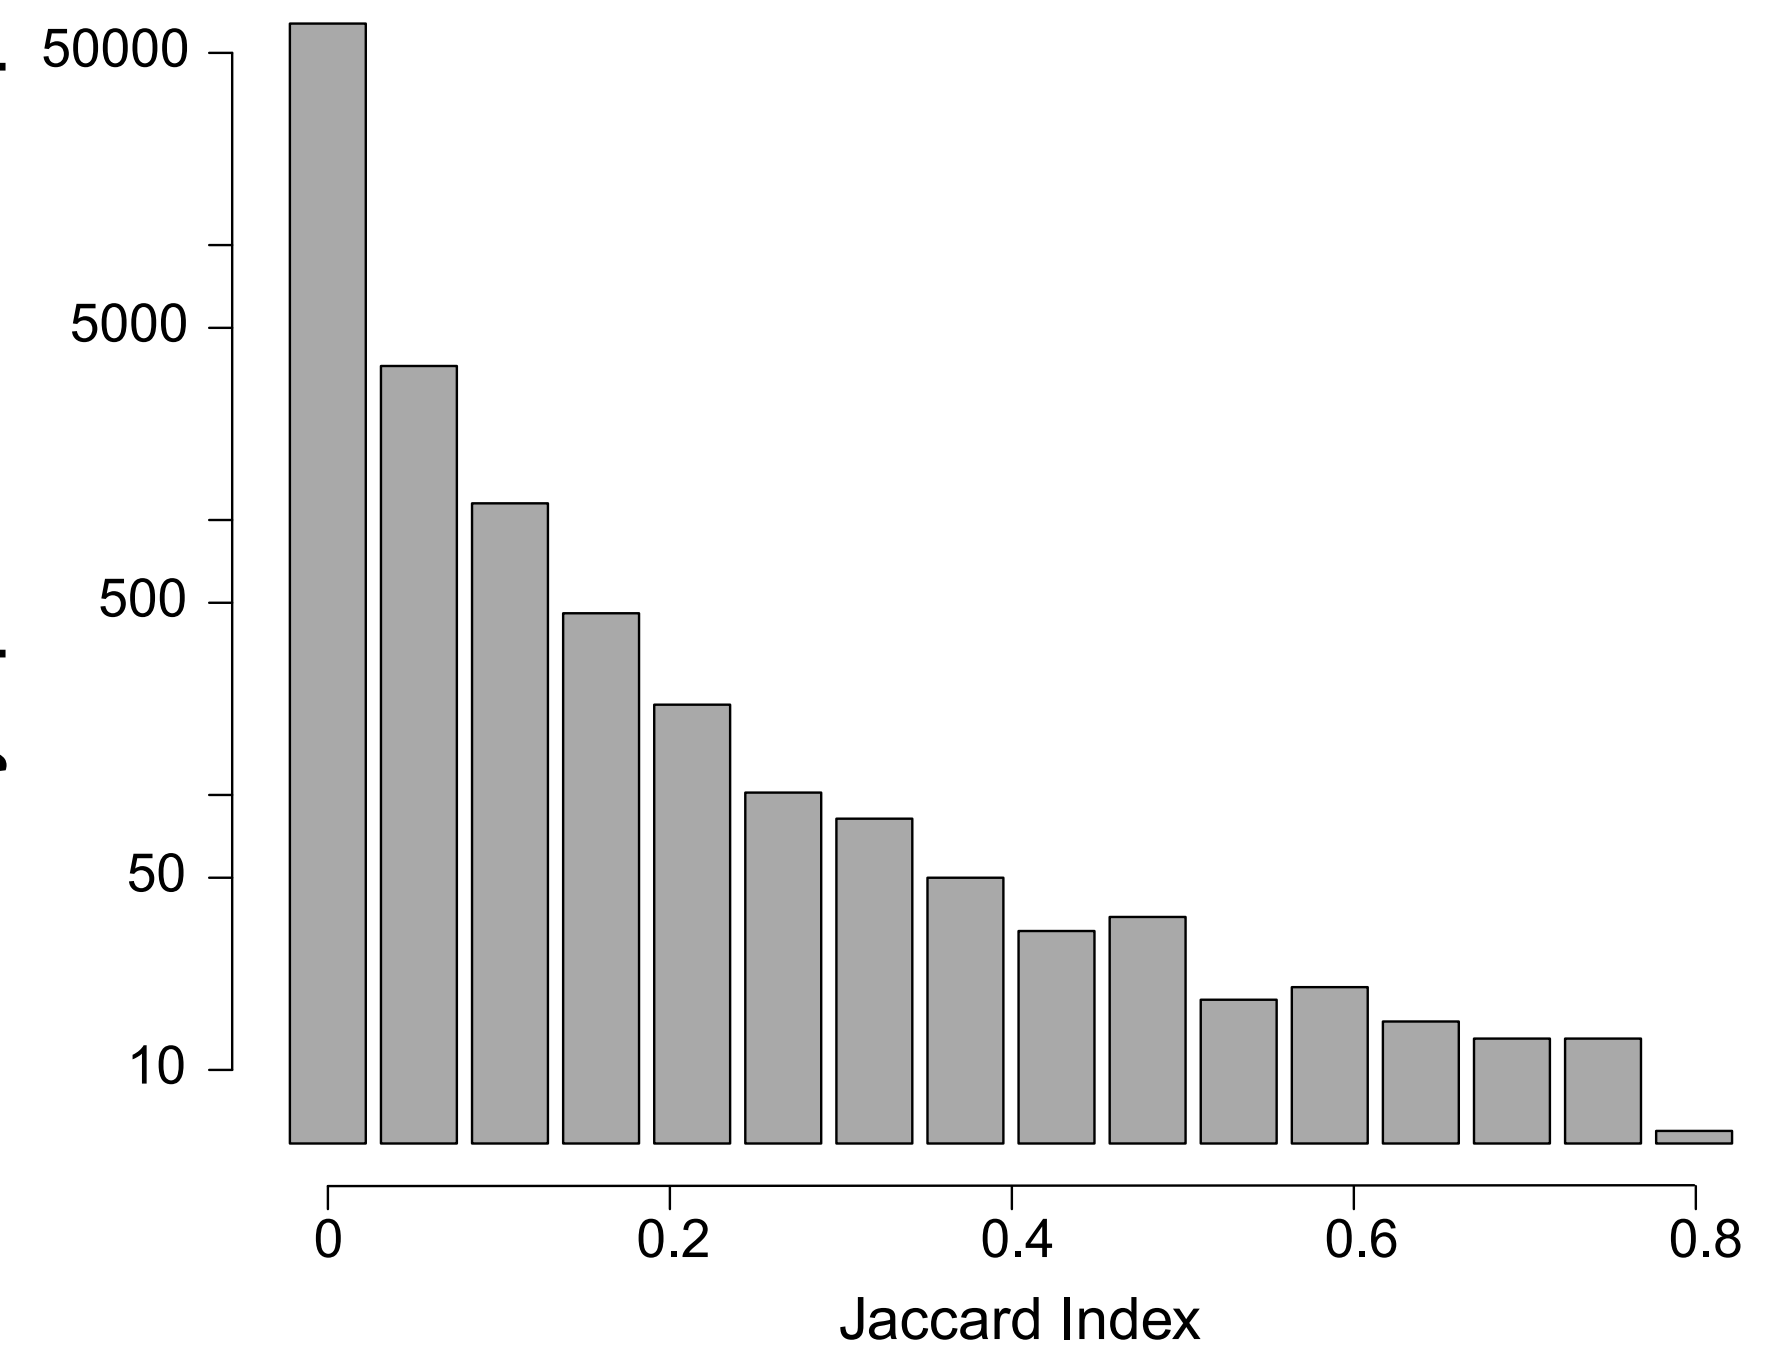

Supplement: Supplementary file [file 077701-3.pdf]
